# Supplementary material
Source: Springer Nature journal article supplement (https://www.springermedizin.de/resource/supplementary/12884_2008_38_MOESM1_ESM.pdf/9459796)

Figure 1: Flow diagram of study selection process

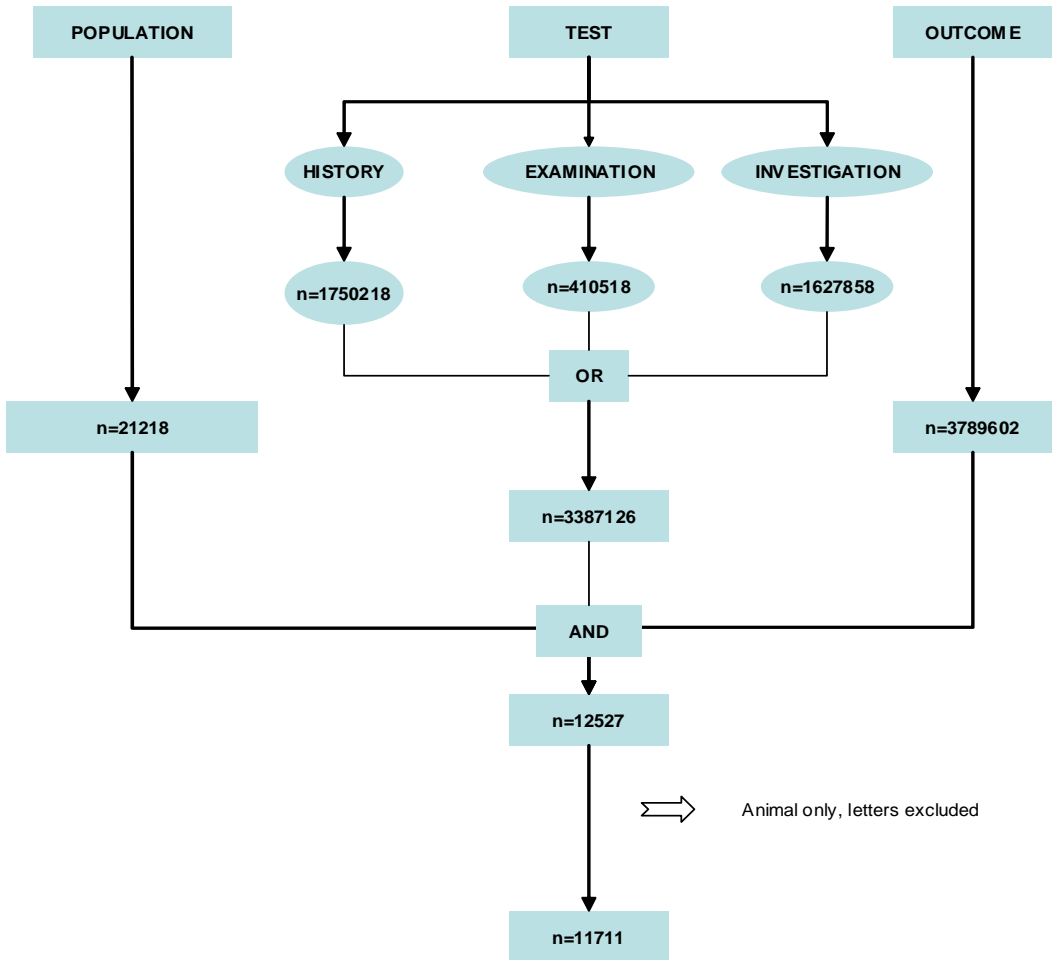

Supplement: MOESM1 [file 9459796]
